# Supplementary material
Source: Research Square preprint supplement (doi:10.21203/rs.3.rs-9065037/v1)
Supplement: Supplementary file 1 [file 4e2f59f53d010ea926efe3fd.pdf]

| <b>Variables</b>                   | <b>Complete<br/>N = 320</b> | <b>Any missing<br/>N = 44</b> | <b>P-value</b> |
|------------------------------------|-----------------------------|-------------------------------|----------------|
| Age (yrs)                          | 68.4 ± 10.4                 | 66.2 ± 10.3                   | 0.198          |
| Female (N, %)                      | 100 (31.3)                  | 12 (27.3)                     | 0.592          |
| Diabetes (%)                       | 37.5                        | 40.9                          | 0.662          |
| Smoke (%)                          | 48.4                        | 40.9                          | 0.348          |
| Hypertension (%)                   | 72.5                        | 61.4                          | 0.126          |
| eGFR (mL/min/1.73 m <sup>2</sup> ) | 79.75<br>(60.10, 91.25)     | 86.60<br>(67.60, 94.20)       | 0.108          |
| TMAO (ng/mL)                       | 206.00<br>(123.32, 288.99)  | 159.16<br>(93.43, 323.66)     | 0.459          |
