# Supplementary material
Source: Research Square preprint supplement (doi:10.21203/rs.3.rs-9065037/v1)
Supplement: Supplementary file 3 [file 8db5bcdbbb56ed243dc1e338.pdf]

| <b>Univariate analysis</b> |                 |           |                 |                 |
|----------------------------|-----------------|-----------|-----------------|-----------------|
|                            | <b><i>P</i></b> | <b>HR</b> | <b>CI lower</b> | <b>CI upper</b> |
| Age                        | <0.001          | 1.087     | 1.052           | 1.123           |
| Gender                     | 0.179           | 0.648     | 0.344           | 1.220           |
| Diabetes                   | 0.051           | 0.539     | 0.290           | 1.002           |
| Smoke                      | 0.767           | 1.099     | 0.589           | 2.049           |
| Hypertension               | 0.056           | 0.429     | 0.180           | 1.023           |
| TG                         | 0.367           | 0.727     | 0.363           | 1.455           |
| TC                         | 0.473           | 0.650     | 0.200           | 2.109           |
| HDL-C                      | 0.064           | 0.265     | 0.065           | 1.083           |
| LDL-C                      | 0.093           | 1.701     | 0.914           | 3.164           |
| eGFR                       | 0.003           | 0.115     | 0.028           | 0.478           |
| NT-proBNP                  | <0.001          | 5.146     | 2.449           | 10.810          |
| hs-TnT                     | <0.001          | 3.299     | 1.723           | 6.319           |
| LVEF                       | 0.003           | 0.969     | 0.949           | 0.990           |
| TMAO                       | <0.001          | 4.766     | 2.556           | 8.889           |
